# Supplementary material for: Selection Response Due to Different Combination of Antagonistic Milk, Beef, and Morphological Traits in the Alpine Grey Cattle Breed
Source: MDPI journal article supplement (doi:10.3390/ani11051340), 2021-05-08
Supplement: s1 [file s1]

**Supplementary Material 1** Genetic (above the diagonal), and phenotypic (below the diagonal) correlations among milk traits, SCS, morphological and beef traits

analyzed. Values reported are means and HPD of the marginal posterior density's region of estimates at 5 and 95% (within brackets).

| TRAIT <sup>1</sup> | MY        | FY        | PY        | SCS     | F2<br>UV | F3<br>UC  | F7<br>RL | HT        | RM        | ADG     | SEUROP    | CY        |
|--------------------|-----------|-----------|-----------|---------|----------|-----------|----------|-----------|-----------|---------|-----------|-----------|
| MY                 |           | 0.758     | 0.845     | 0.069   | 0.330    | -0.448    | 0.060    | -0.091    | -0.458    | -0.071  | -0.240    | -0.156    |
|                    |           | (0.732    | (0.829    | (-0.001 | (0.235   | (-0.546 - | (-0.066  | (-0.191   | (-0.547 - | (-0.362 | (-0.491   | (-0.363   |
|                    |           | 0.781)    | 0.860)    | 0.141)  | 0.421)   | 0.354)    | 0.182)   | 0.011)    | 0.365)    | 0.187)  | 0.001)    | 0.051)    |
| FY                 | 0.768     |           | 0.824     | 0.067   | 0.286    | -0.326    | 0.045    | -0.136    | -0.413    | -0.092  | 0.029     | -0.103    |
|                    | (0.752    |           | (0.804    | (-0.008 | (0.185   | (-0.429 - | (-0.086  | (-0.241 - | (-0.514 - | (-0.339 | (-0.196   | (-0.390   |
|                    | 0.802)    |           | 0.844)    | 0.144)  | 0.383)   | 0.224)    | 0.175)   | 0.033)    | 0.316)    | 0.145)  | 0.233)    | 0.140)    |
| PY                 | 0.905     | 0.766     |           | 0.088   | 0.289    | -0.423    | 0.099    | -0.169    | -0.397    | -0.066  | 0.175     | -0.156    |
|                    | (0.850    | (0.244    |           | (0.014  | (0.188   | (-0.521 - | (-0.031  | (-0.274 - | (-0.493   | (-0.280 | (-0.102   | (-0.385   |
|                    | 0.960)    | 0.247)    |           | 0.164)  | 0.388)   | 0.322)    | 0.228)   | 0.062)    | 0.299)    | 0.139)  | 0.433)    | 0.073)    |
| SCS                | -0.149    | -0.08     | -0.111    |         | 0.246    | 0.149     | 0.190    | -0.109    | -0.158    | -0.184  | -0.008    | -0.259    |
|                    | (-0.250 - | (-0.120 - | (-0.195 - |         | (0.120   | (0.009    | (0.005   | (-0.223   | (-0.274 - | (-0.452 | (-0.219   | (-0.475 - |
|                    | 0.050)    | 0.020)    | 0.060)    |         | 0.369)   | 0.284)    | 0.240)   | 0.004)    | 0.039)    | 0.043)  | 0.182)    | 0.054)    |
| F2-UV              | 0.240     | 0.172     | 0.211     | -0.001  |          | -0.208    | 0.097    | 0.129     | -0.319    | -0.121  | -0.351    | -0.359    |
|                    | (0.211    | (-0.080 - | (-0.119 - | (-0.006 |          | (-0.340 - | (-0.062  | (-0.005   | (-0.441 - | (-0.395 | (-0.536 - | (-0.736 - |
|                    | 0.244)    | 0.051)    | 0.085)    | 0.028)  |          | 0.073)    | 0.260)   | 0.259)    | 0.190)    | 0.144)  | 0.129)    | 0.040)    |
| F3-UC              | -0.122    | -0.067    | -0.104    | 0.012   | 0.030    |           | 0.098    | 0.079     | 0.346     | -0.128  | 0.067     | 0.061     |
|                    | (-0.137 - | (-0.010   | (-0.300   | (-0.006 | (-0.120  |           | (-0.067  | (-0.057   | (0.224    | (-0.444 | (-0.210   | (-0.258   |
|                    | 0.101)    | 0.028)    | 0.037)    | 0.028)  | 0.054)   |           | 0.255)   | 0.209)    | 0.463)    | 0.157)  | 0.334)    | 0.381)    |
| F7-RL              | 0.02      | 0.014     | 0.021     | 0.012   | 0.033    | 0.01      |          | 0.075     | -0.324    | 0.148   | -0.156    | -0.159    |
|                    | (0.001    | (-0.213   | (-0.238   | (-0.023 | (-0.326  | (-0.243   |          | (-0.053   | (-0.460 - | (-0.176 | (-0.457   | (-0.573   |
|                    | 0.038)    | 0.147)    | 0.157)    | 0.056)  | 0.224)   | 0.344)    |          | 0.197)    | 0.183)    | 0.426)  | 0.157)    | 0.213)    |
| HT                 | -0.02     | -0.012    | -0.023    | -0.022  | 0.007    | 0.021     | 0.009    |           | 0.075     | -0.189  | 0.208     | 0.171     |

|              |           |         |           |           |           |         |           |         |         |         |               |         |
|--------------|-----------|---------|-----------|-----------|-----------|---------|-----------|---------|---------|---------|---------------|---------|
|              | (-0.093 - | (-0.072 | (-0.135   | (-0.113   | (-0.036   | (-0.040 | (-0.014   |         | (-0.053 | (-0.477 | (-0.051       | (-0.129 |
|              | 0.002)    | 0.035)  | 0.070)    | 0.011)    | 0.014)    | 0.106)  | 0.040)    |         | 0.197)  | 0.081)  | 0.463)        | 0.481)  |
|              | -0.134    | -0.079  | -0.086    | 0.001     | -0.120    | 0.128   | -0.177    | 0.085   |         | 0.656   | 0.798         | 0.849   |
| <b>RM</b>    | (-0.349 - | (-0.066 | (-0.100 - | (-0.095 - | (-0.114 - | (-0.006 | (-0.262 - | (0.031  |         | (0.343  | (0.556        | (0.540  |
|              | 0.265)    | 0.006)  | 0.013)    | 0.012)    | 0.227)    | 0.159)  | 0.151)    | 0.180)  |         | 0.909)  | 0.981)        | 0.991)  |
|              | -0.014    | -0.018  | -0.015    | -0.046    | -0.034    | -0.037  | 0.043     | -0.064  | 0.582   |         | 0.839         | 0.545   |
| <b>ADG</b>   | (-0.069   | (-0.045 | (-0.021   | (-0.110   | (-0.437   | (-0.169 | (-0.313   | (-0.105 | (0.408  |         | (0.594        | (0.156  |
|              | 0.036)    | 0.053)  | 0.085)    | 0.093)    | 0.097)    | 0.264)  | 0.111)    | 0.405)  | 0.719)  |         | 0.996)        | 0.977)  |
| <b>SEURO</b> | -0.057    | 0.006   | 0.034     | -0.002    | -0.133    | 0.025   | -0.052    | 0.087   | 0.276   | 0.621   |               | 0.928   |
| <b>P</b>     | (-0.122   | (-0.088 | (-0.106   | (-0.257   | (-0.211 - | (-0.094 | (-0.151   | (-0.049 | (0.184  | (0.614  |               | (0.831  |
|              | 0.000)    | 0.031)  | 0.022)    | 0.031)    | 0.014)    | 0.129)  | 0.068)    | 0.183)  | 0.338)  | 0.741)  |               | 0.990)  |
|              | -0.047    | -0.024  | -0.041    | -0.07     | -0.109    | 0.019   | -0.041    | 0.06    | 0.241   | 0.545   | 0.825         |         |
| <b>CY</b>    | (-0.219   | (-0.088 | (-0.106   | (-0.257 - | (-0.211 - | (-0.094 | (-0.151   | (-0.049 | (0.184  | (0.380  | (0.780. 1.00) |         |
|              | 0.034)    | 0.031)  | 0.022)    | 0.031)    | 0.014)    | 0.129)  | 0.068)    | 0.183)  | 0.338)  | 0.994)  |               |         |

---
